# Supplementary material
Source: publisher site journal article supplement (https://www.dovepress.com/article/266752)
Supplement: Supplementary file 1 [file get_supplementary_file.php]

**
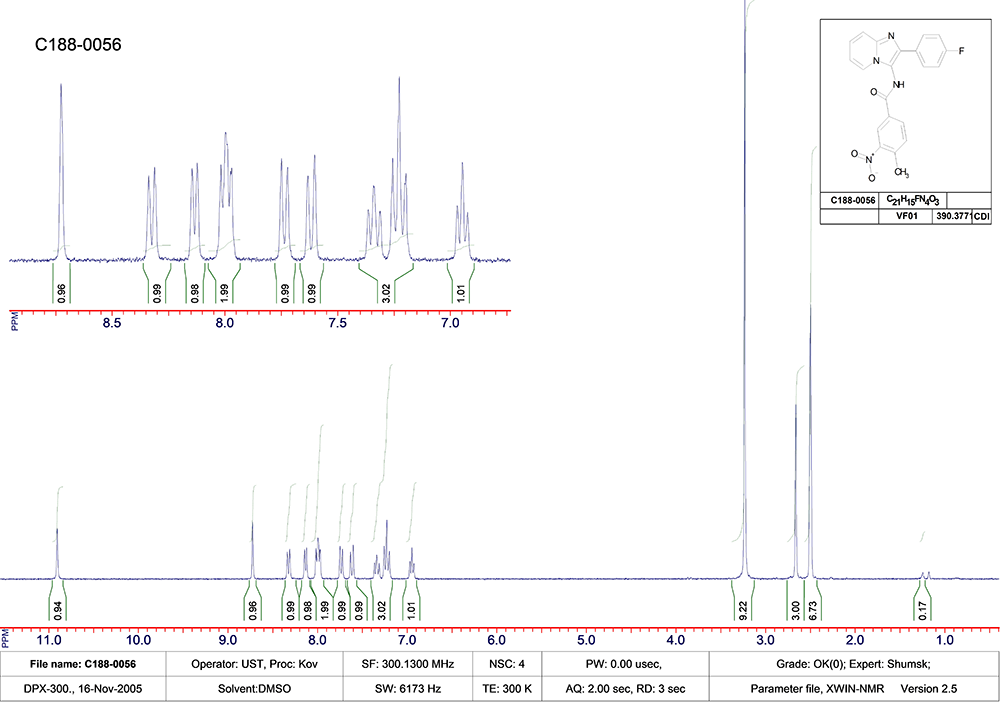
**

**Figure S1: The nuclear magnetic resonance data of C188**

**
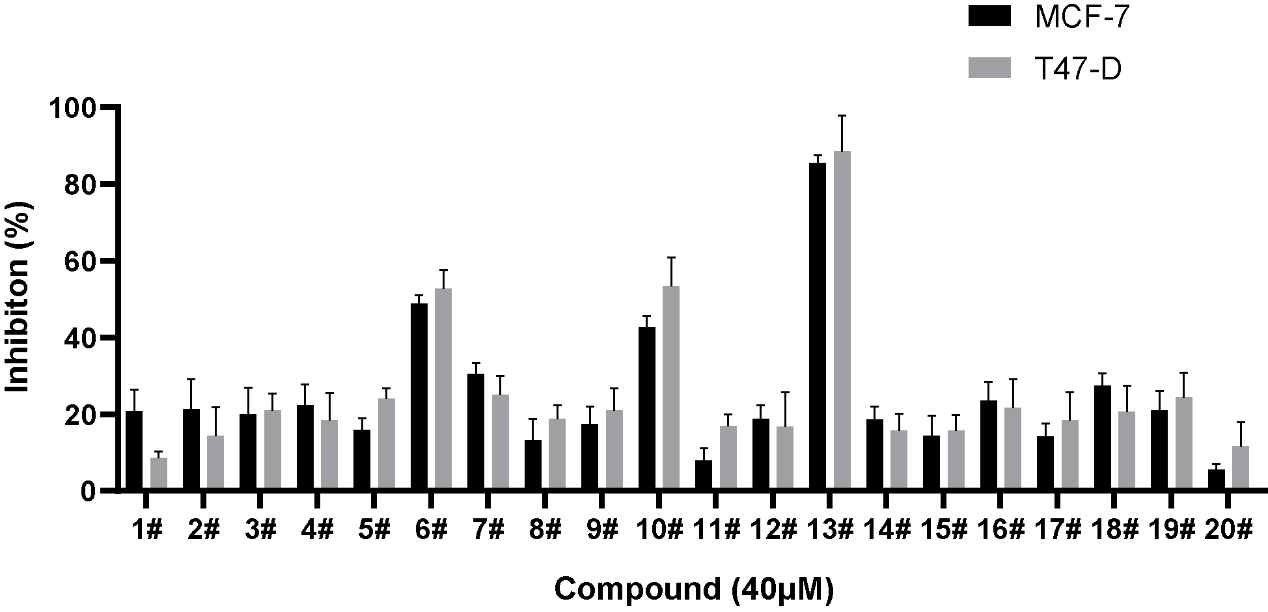
**

**Figure S2: The viability of 20 imidazopyrdine derivatives on both MCE-7 and T47-D cells.**

The chemical library of imidazopyrdine derivatives was purchased from TagerMol which contains more than 100 compounds. We currently screened 20 compounds using MTT by High Content analysis system and obtained C188 displaying cytotoxicity to breast cancer cells. The following figure is the result of MTT for 20 compounds we screened and 13# is the C188.
